# Supplementary material for: Comprehensive analysis of cuproptosis-related immune biomarker signature to enhance prognostic accuracy in gastric cancer
Source: publisher site journal article supplement (doi:10.18632/aging.204646), 2023-04-07
Supplement: Supplementary file [file aging-v15i7-204646-supplementary-material-SD1.pdf]

**SUPPLEMENTARY FIGURES**

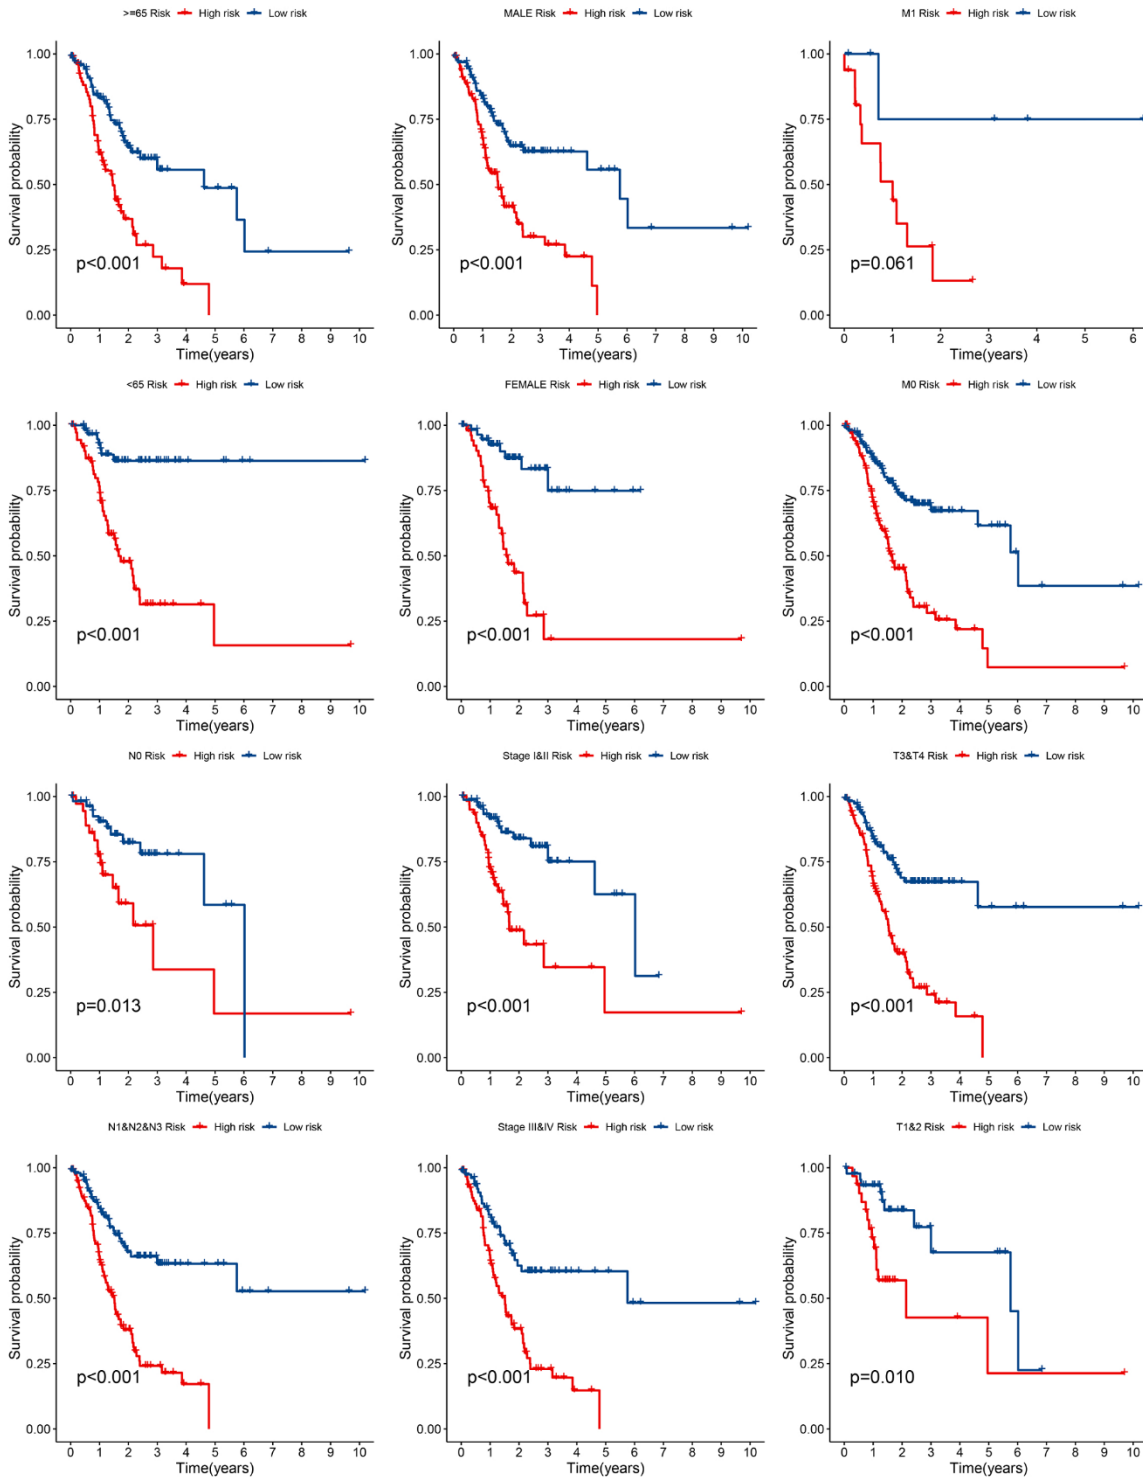

**Supplementary Figure 1. Kaplan-Meier curves of OS differences stratified by age, gender, M stage, N stage, T stage, and pathological stage between the high-risk groups and low-risk groups.**

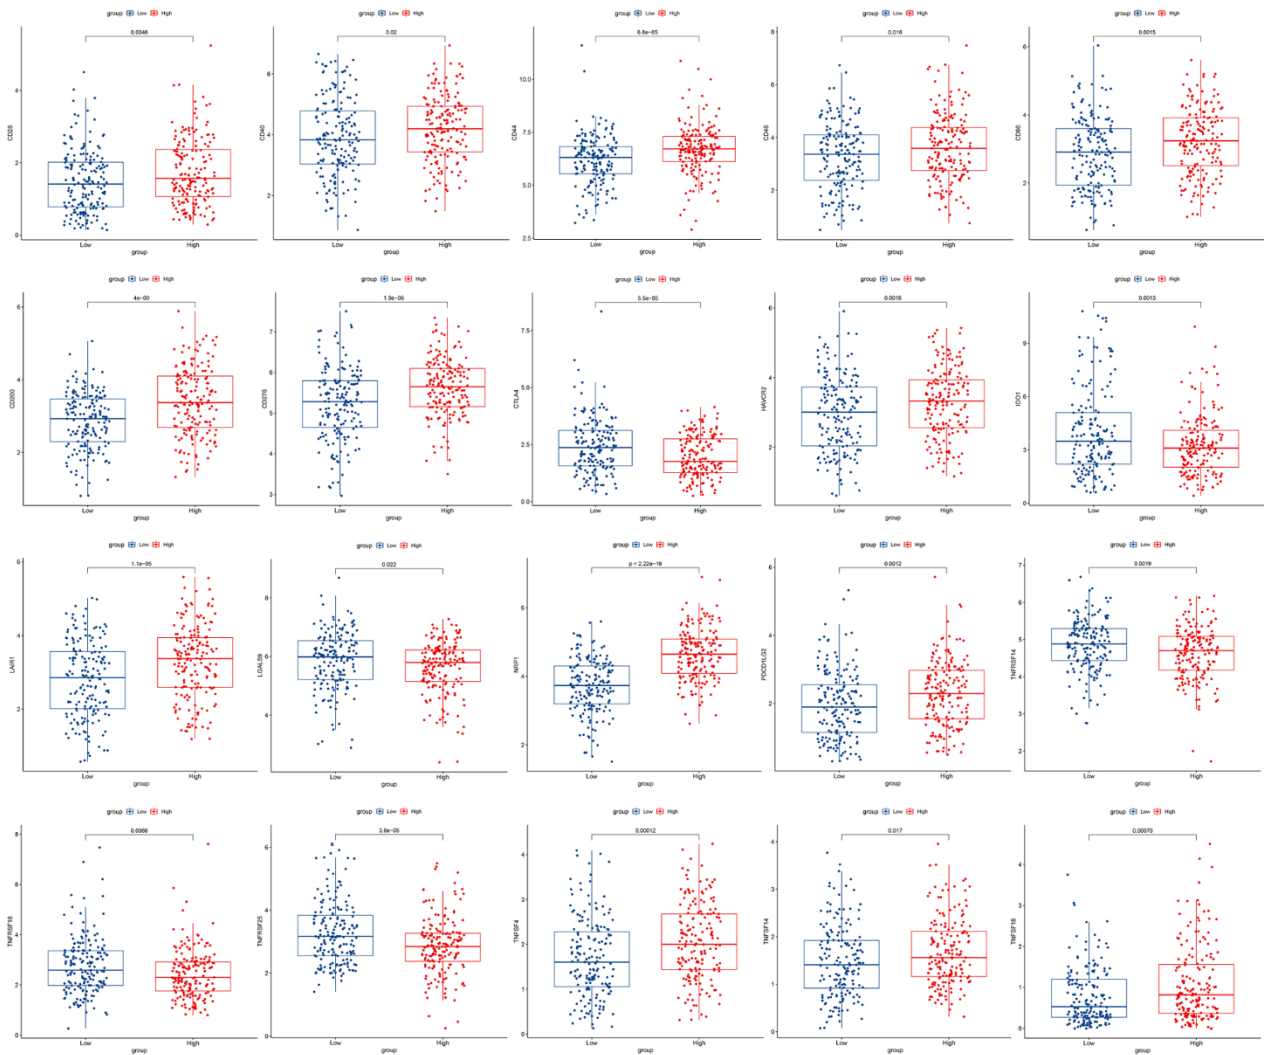

**Supplementary Figure 2. The expression of immune checkpoints between high-risk groups and low-risk groups.**

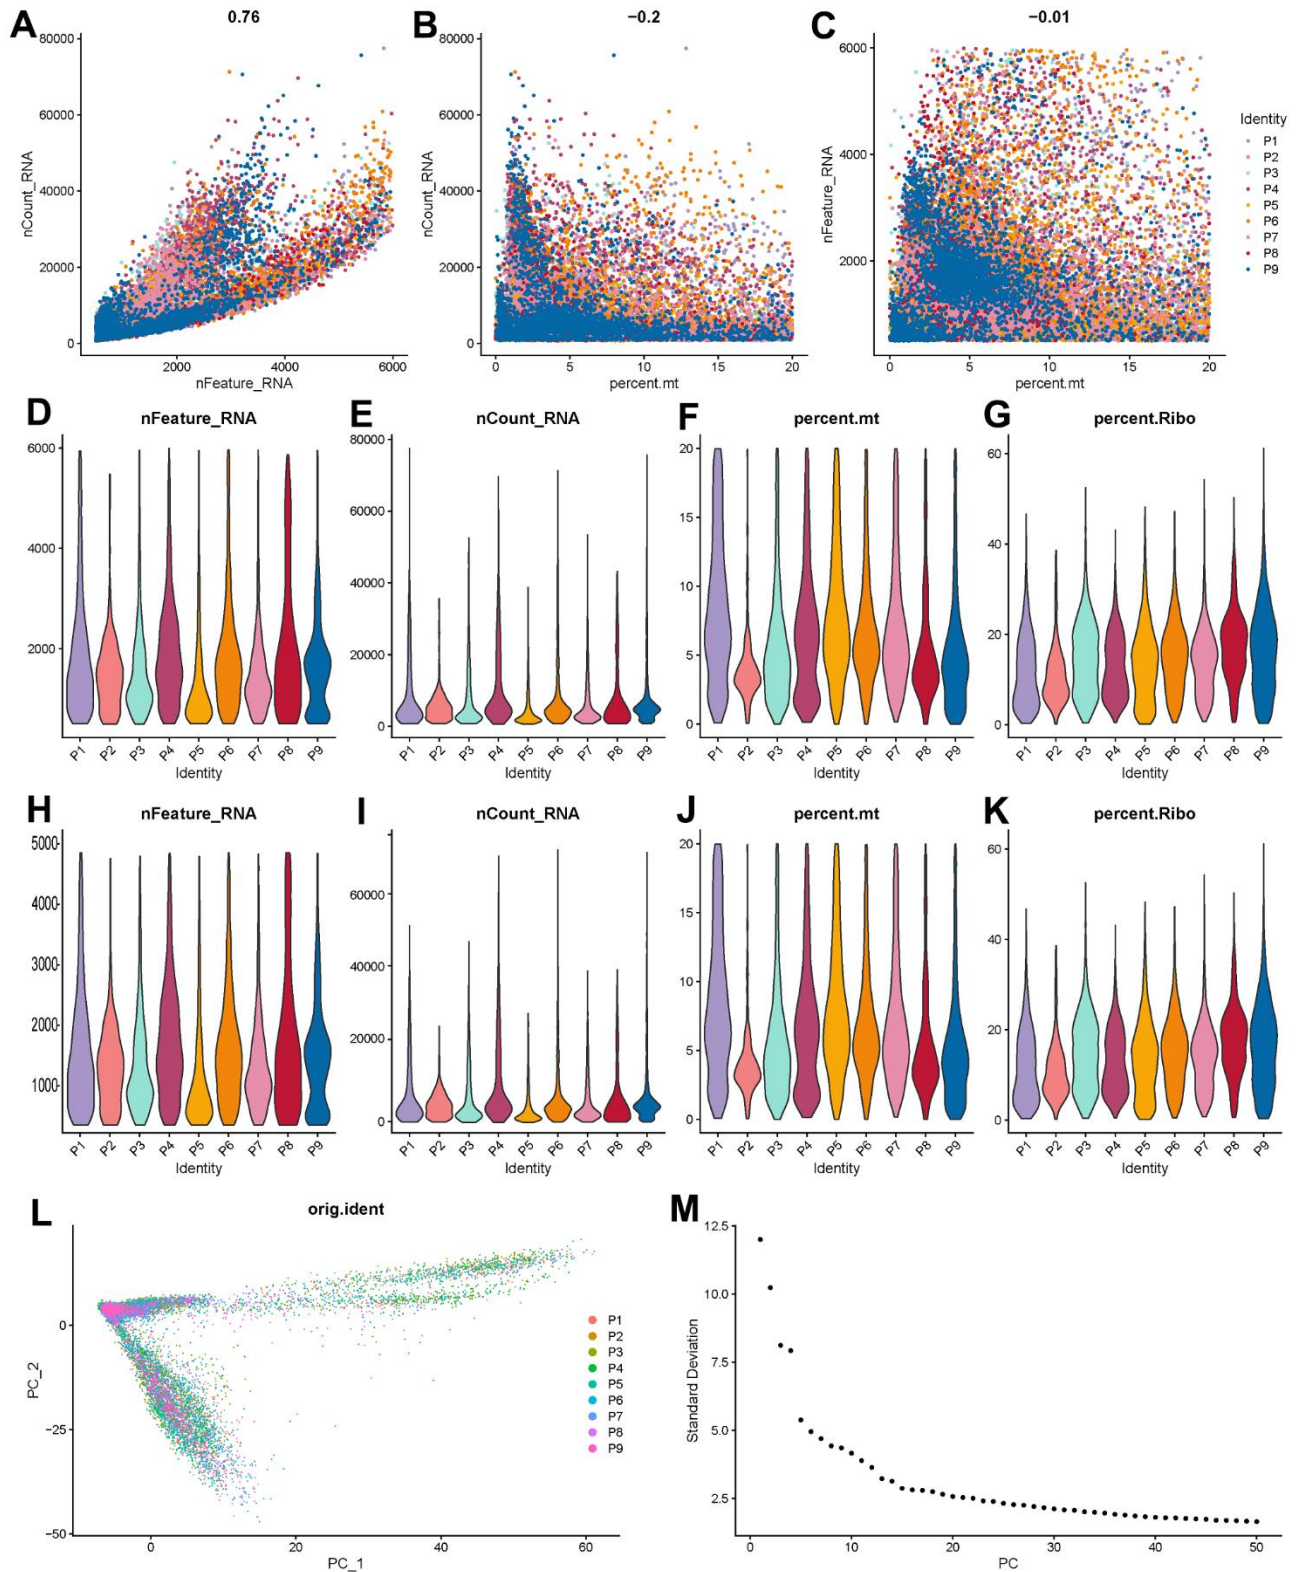

**Supplementary Figure 3. Quality control of GC single cells.** (A–C) Correlation analysis between nFeature and nCount, mitochondrial gene ratio and nCount, mitochondrial gene ratio and nFeature among different samples. (D–G) Violin plots of nFeature, nCount, mitochondrial gene ratio and hemoglobin gene ratio between different samples before quality control screening. (H–K) Violin plots of nFeature, nCount, mitochondrial gene ratio and hemoglobin gene ratio between different samples after quality control screening. (L) Cell PCA dimensionality reduction analysis of different samples. (M) The reference map of principal components (PCs) selection.
